# Supplementary material for: Role and limitations of rehabilitation-induced neural network remodeling after stroke
Source: PubMed Central journal article supplement — Neural Regen Res. 2018 Dec;13(12):2087–8. doi: 10.4103/1673-5374.241450 (PMC6199934; doi:10.4103/1673-5374.241450), 2018-12
Supplement: NRR-13-2087_Suppl1.pdf [file NRR-13-2087_Suppl1.pdf]

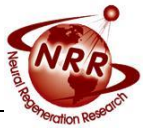

## PEER-REVIEW REPORT 1

**Name of journal:** Neural Regeneration Research

**Manuscript NO:** NRR-D-18-00415

**Title:** Role and limitations of rehabilitation-induced neural network remodeling after stroke

**Reviewer's Name:** Ramon Navarro

**Reviewer's country:** United Arab Emirates

**Date sent for review:** 2018-06-20

**Date reviewed:** 2018-07-06

**Review time:** 16 Days

### COMMENTS TO AUTHORS

This manuscript tries to highlight the importance of rehabilitation and neuroplasticity in order to regain function after stroke affecting the motor cortex in rodents. The areas of future research are highlighted. Translation to clinical practice is key to prove this concept in humans. Author's should include a way to measure the corticospinal tract integrity in humans. Would MRI tractography be a reliable method to assess this? They should also be more specific in bringing information about neuroprotection after stroke to avoid secondary damage and neuroplasticity strategies. These would make the paper more interesting to readers.
